# Supplementary material
Source: PubMed Central journal article supplement (PMC2077308)

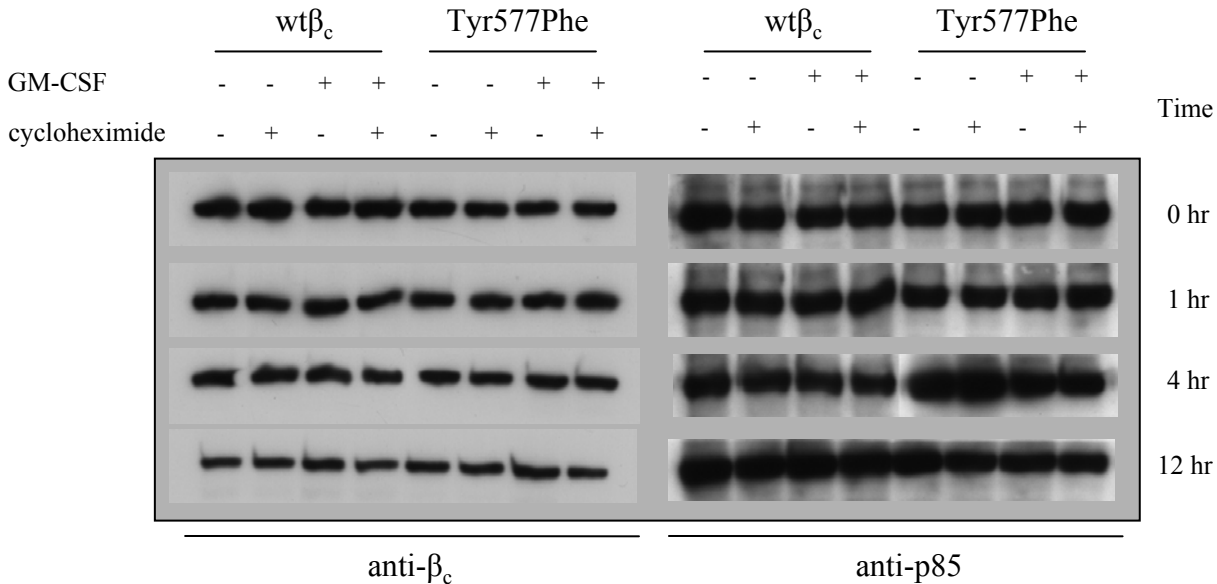

Supplement: blood_blood-2007-01-070391_1.pdf [file blood_blood-2007-01-070391_1.pdf]
